# Supplementary material for: Signatures of Pleistocene Marine Transgression Preserved in Lithified Coastal Dune Morphology of The Bahamas
Source: MDPI journal article supplement (doi:10.3390/geosciences13120367), 2023-11-28
Supplement: s1 [file s1]

# Signatures of Pleistocene Marine Transgression Preserved in Lithified Coastal Dune Morphology of The Bahamas

Kat Wilson <sup>1,2,\*</sup> and David Mohrig <sup>2</sup>

<sup>1</sup> Department of Earth and Environmental Sciences, Boston College, Chestnut Hill, MA, 02467, USA

<sup>2</sup> Jackson School of Geosciences, The University of Texas at Austin, Austin, TX, 78712, USA; mohrig@jsg.utexas.edu

\* Correspondence: kathleen.wilson@bc.edu

Supplemental Material 1: Sinuosity variables index

**Data to calculate Sinuosity are contained within two tables**

Tables include

1. Shape ID is an arbitrary identifier for dune forms. (no units)
2. An indicator of lee or stoss face. (no units)
3. Whether the dune is scarped (truncated) or not. (no units)
4. Limb length (the perimeter length at the base of the stoss or lee face). (unit = meter)
5. Midline length (the straight line distance from end to end of the duneform in the direction perpendicular to paleo-migration/sediment transport) (unit = meter)
6. Sinuosity value = limb length / midline length (unit = meter/meter)

**Variable names are constructed from abbreviations of key information related to sinuosity.**

Example: mu\_SSTruncLee = the average sinuosity of the lee face of scarped dunes in San Salvador

## **Statistics:**

Mu = average

Std = standard deviation

## **Location:**

Ele= Eleuthera

SS = San Salvador

## **Dune Morphology:**

Trunc = Scarped duneform

Unmod = Default, sinuous duneforms

Stoss = Upwind face

Lee = Downwind face
