# Supplementary material for: Signatures of Pleistocene Marine Transgression Preserved in Lithified Coastal Dune Morphology of The Bahamas
Source: MDPI journal article supplement (doi:10.3390/geosciences13120367), 2023-11-28
Supplement: s1 [file s1]

# Signatures of Pleistocene Marine Transgression Preserved in Lithified Coastal Dune Morphology of The Bahamas

Kat Wilson <sup>1,2,\*</sup> and David Mohrig <sup>2</sup>

<sup>1</sup> Department of Earth and Environmental Sciences, Boston College, Chestnut Hill, MA, 02467, USA

<sup>2</sup> Jackson School of Geosciences, The University of Texas at Austin, Austin, TX, 78712, USA; mohrig@jsg.utexas.edu

\* Correspondence: kathleen.wilson@bc.edu

Supplemental Material 2: Slope variables index

**The raw data of slope values extracted from DEMs are contained within six tables (Stoss, Lee, and Scarped Slopes on Eleuthera and San Salvador)**

Tables include

1. OBJECT ID – automatically generated identifier from ArcGIS (no units)
2. Slope – value extracted from DEMs in ArcGIS (units = degrees)

**Variable names are constructed from abbreviations of key information.**

Example: mu\_SSlee = the average slope value of the all the lee face measurements in San Salvador

## **Statistics:**

Mu = average

Std = standard deviation

## **Location:**

Ele= Eleuthera

SS = San Salvador

## **Dune Morphology:**

Trunc = Upwind face of Scarped duneform

Stoss = Upwind face of sinuous duneform

Lee = Downwind face
