# Supplementary material for: Signatures of Pleistocene Marine Transgression Preserved in Lithified Coastal Dune Morphology of The Bahamas
Source: MDPI journal article supplement (doi:10.3390/geosciences13120367), 2023-11-28
Supplement: s1 [file s1]

# Signatures of Pleistocene Marine Transgression Preserved in Lithified Coastal Dune Morphology of The Bahamas

Kat Wilson <sup>1,2,\*</sup> and David Mohrig <sup>2</sup>

<sup>1</sup> Department of Earth and Environmental Sciences, Boston College, Chestnut Hill, MA, 02467, USA

<sup>2</sup> Jackson School of Geosciences, The University of Texas at Austin, Austin, TX, 78712, USA; mohrig@jsg.utexas.edu

\* Correspondence: kathleen.wilson@bc.edu

Supplemental Material 3: Dune Profile index and details

Supplemental Figure 1: Dune elevations by profile ID

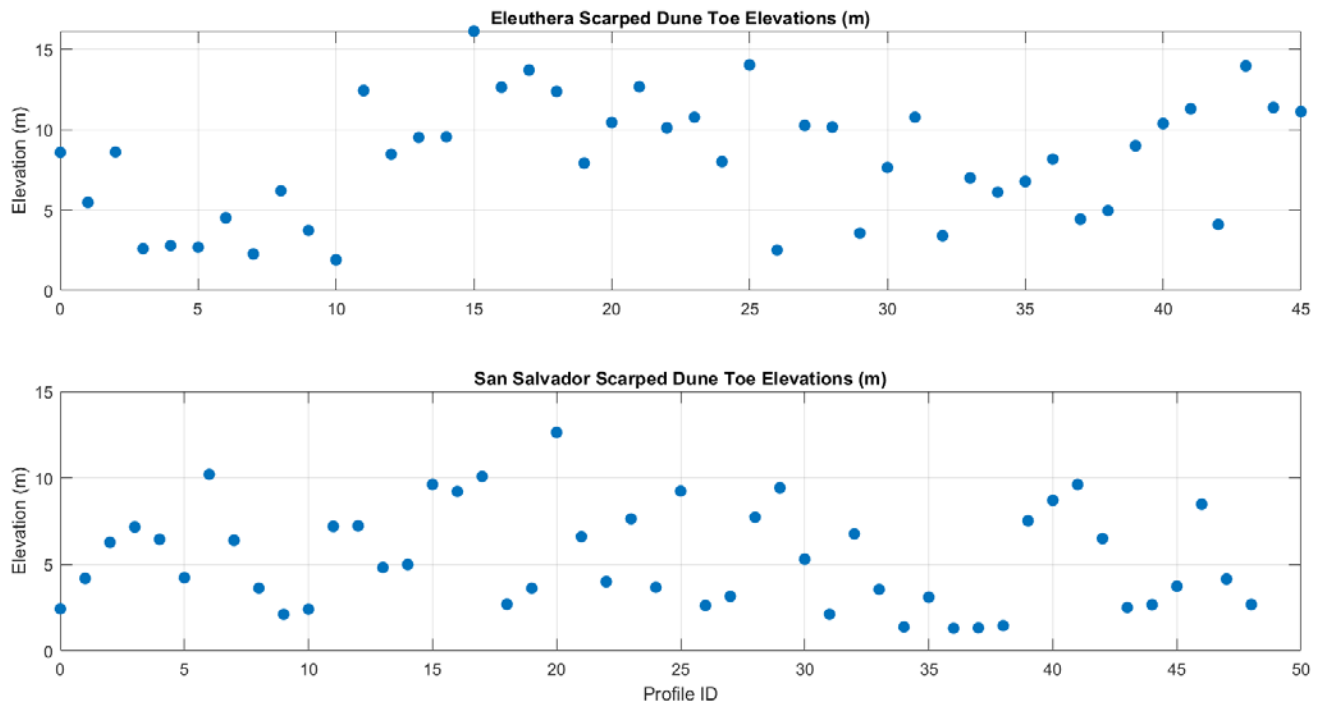

The following pairs of dune profiles were extracted along the same ridge:

**Eleuthera Foredune Profile:**

PROFILE ID 0, 1 & 2

PROFILE ID 3, 4 & 5

PROFILE ID 6, 7, 8, 9, & 10

PROFILE ID 11, 12 & 13

PROFILE ID 15, 16, 17 & 18

PROFILE ID 19, 20 & 21

PROFILE ID 22, 23, & 24

PROFILE ID 25 – 30

PROFILE ID 31, 32, 33

PROFILE ID 34 – 36

PROFILE ID 37, 38, & 40

PROFILE ID 42 - 45

**SS Foredune Profile:**

PROFILE ID 0 & 5

PROFILE ID 1 – 4

PROFILE ID 6 & 7

PROFILE ID 8 – 11

PROFILE ID 13, 14 & 27

PROFILE ID 15, 16, 17, 22, 23

PROFILE ID 24, 25, 26

PROFILE ID 18, 19, 20, 21

PROFILE ID 28, 29, 30

PROFILE ID 31 & 32

PROFILE ID 33,34,35

PROFILE ID 36, 37, 38

PROFILE ID 39, 40, 41, 42

PROFILE ID 43- 45

PROFILE ID 47 – 48
